# Supplementary material
Source: MDPI journal article supplement (https://www.mdpi.com/2306-5710/2/1/6)
Supplement: s1 [file s1]

# Supplementary Materials: A New Wine Tasting Approach Based on Emotional Responses to Rapidly Recognise Classic European Wine Styles

Virgílio Loureiro, Renato Brasil and Manuel Malfeito-Ferreira

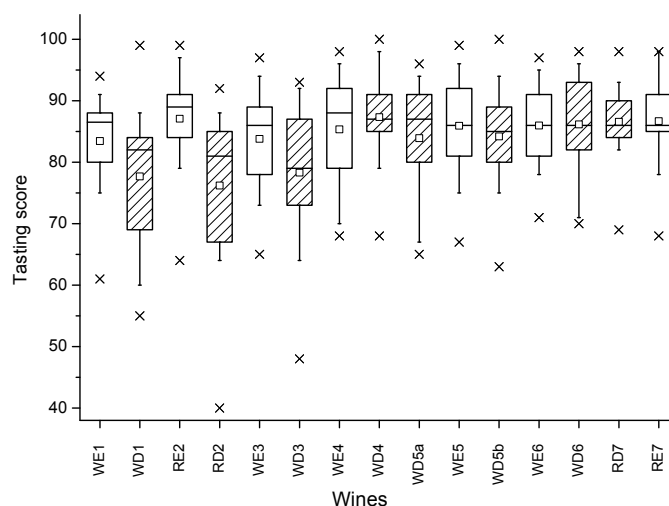

**Figure S1.** Box plot of tasting scores given by the 2012 panel to white and red wines (“easy” wines, open box; “difficult” wines, dashed box). Symbols: □, mean; x, maximum and minimum. Percentiles: 10%, bar at bottom of whisker; 90%, bar at bottom of whisker; 25%, box bottom; 50%, box internal line; 75% box top.

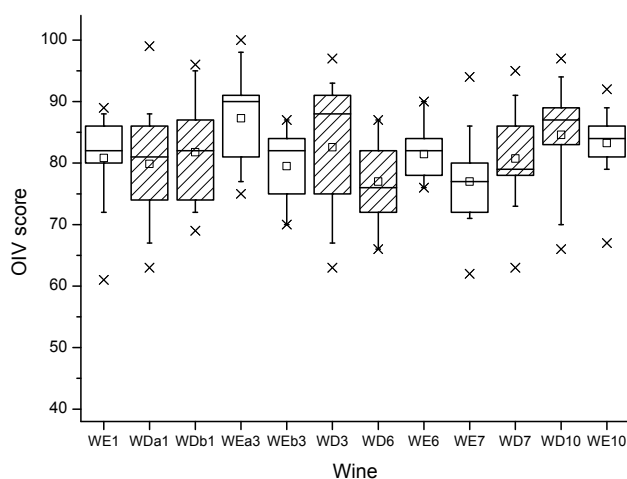

**Figure S2.** Box plot of tasting scores given by the 2014 panel to white wines (“easy” wines, open box; “difficult” wines, dashed box). Symbols: □, mean; x, maximum and minimum. Percentiles: 10%, bar at bottom of whisker; 90%, bar at bottom of whisker; 25%, box bottom; 50%, box internal line; 75% box top.

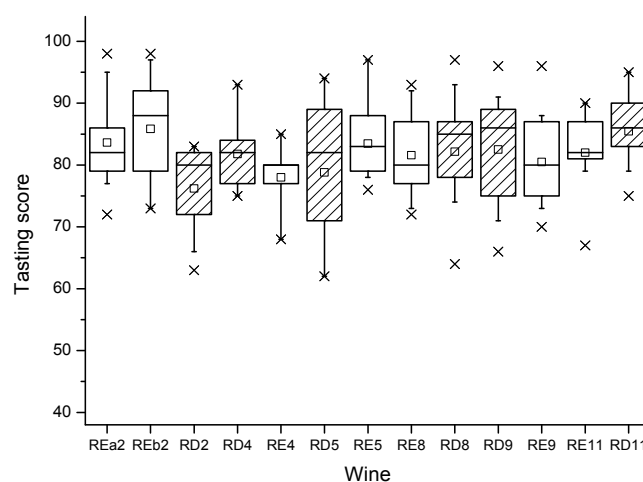

**Figure S3.** Box plot of tasting scores given by the 2014 panel to red wines (“easy wines, open box, “difficult” wines, dashed box). Symbols: □, mean; x, maximum and minimum. Percentiles: 10%, bar at bottom of whisker; 90%, bar at bottom of whisker; 25%, box bottom; 50%, box internal line; 75% box top.

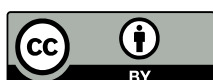

© 2016 by the authors; licensee MDPI, Basel, Switzerland. This article is an open access article distributed under the terms and conditions of the Creative Commons by Attribution (CC-BY) license (<http://creativecommons.org/licenses/by/4.0/>).
